# Supplementary material
Source: publisher figshare collection journal article supplement (https://future-science-group.figshare.com/ndownloader/files/31949774)
Supplement: Supplementary file 1 [file 31949774]

**Supporting Information**

**A nano-phytochemical ophthalmic solution for marked improvement of corneal wound healing in healthy and diabetic mice**

**Running title:** Nano-phytochemical ophthalmic solution

**Supplementary Methods**

**Chemicals and animals**

PAL was bought from Shanghai Aladdin Biochemical Technology Co., LTD. (Shanghai, China). DG with a purity of more than 98% was obtained from Shanxi Fujie Pharmaceutical Co., Ltd. (Sanyuan, China). Coumarin-6 (Cou-6) was obtained from Sigma-Aldrich, Co. (St. Louis, MO, USA).

Male C57BL/6 mice (8 weeks old) were purchased from Jinan Pengyue Experimental Animal Breeding Co., Ltd. (Jinan, Shandong, China). New Zealand white rabbits were purchased from Qingdao Kangda Foodstuffs Co., Ltd. (Qingdao, China). Animal care and procedures complied with the Guide for the Care and Use of Laboratory Animals, and the animal experiment was approved by the Qingdao University of Science and Technology Ethics Committee for Animal Experimentation (approval document No. 2017-1, Qingdao, China).

**Quantitative ultraviolet-visible spectrophotometric analysis**

The concentration of PAL was monitored by UV (Infinite 200 Pro, Austria) with quartz cell with lid at 326 nm, the maximum wavelength (λmax) available through scanning between 300 and 500 nm. DG-FIT solution was diluted 25× with methanol to disrupt the micelles. The control solutions were equal to those mentioned but exclude PAL. The values of controls were subtracted from the samples to eliminate the contribution of scattering artifacts.

**Antioxidant activity**

Antioxidant activity of DG-PAL was evaluated both by free radical scavenging against 2,2′-azino-bis-(3-ethylbenzo-thiazoline-6-sulfonic acid) diammonium salt (ABTS) assays, and by Fe(III) reducing antioxidant power (FRAP) assays, performed as the kit instruction (Biyuntian, Shanghai, China). Free PAL solution with concentrations of 100, 150, 200, 250, 300, and 500 µg/ml, DG solution with concentrations of 1.50, 2.25, 3.00, 3.75, 4.50, and 7.50 mg/ml, and DG-PAL solution (DG/PAL mass ratio 15:1) with PAL concentrations of 100, 150, 200, 250, 300, and 500 µg/ml were tested here with 5, 15, 30, 60, 90, and 120 min incubation, respectively.

**Table S1 Antibody information**

| Primary antibody | Supplier | Catalog number | Dilution |
| --- | --- | --- | --- |
| HMGB1 Polyclonal Antibody | ABclonal | A0719 | 1:1000 |
| Anti-RAGE antibody | Abcam | Ab3611 | 1:2500 |
| Anti-Beta Ⅲ tubilin, Alexa Fluor® 488 Conjugate | Millipore | AB15708A4 | 1:200 |

**
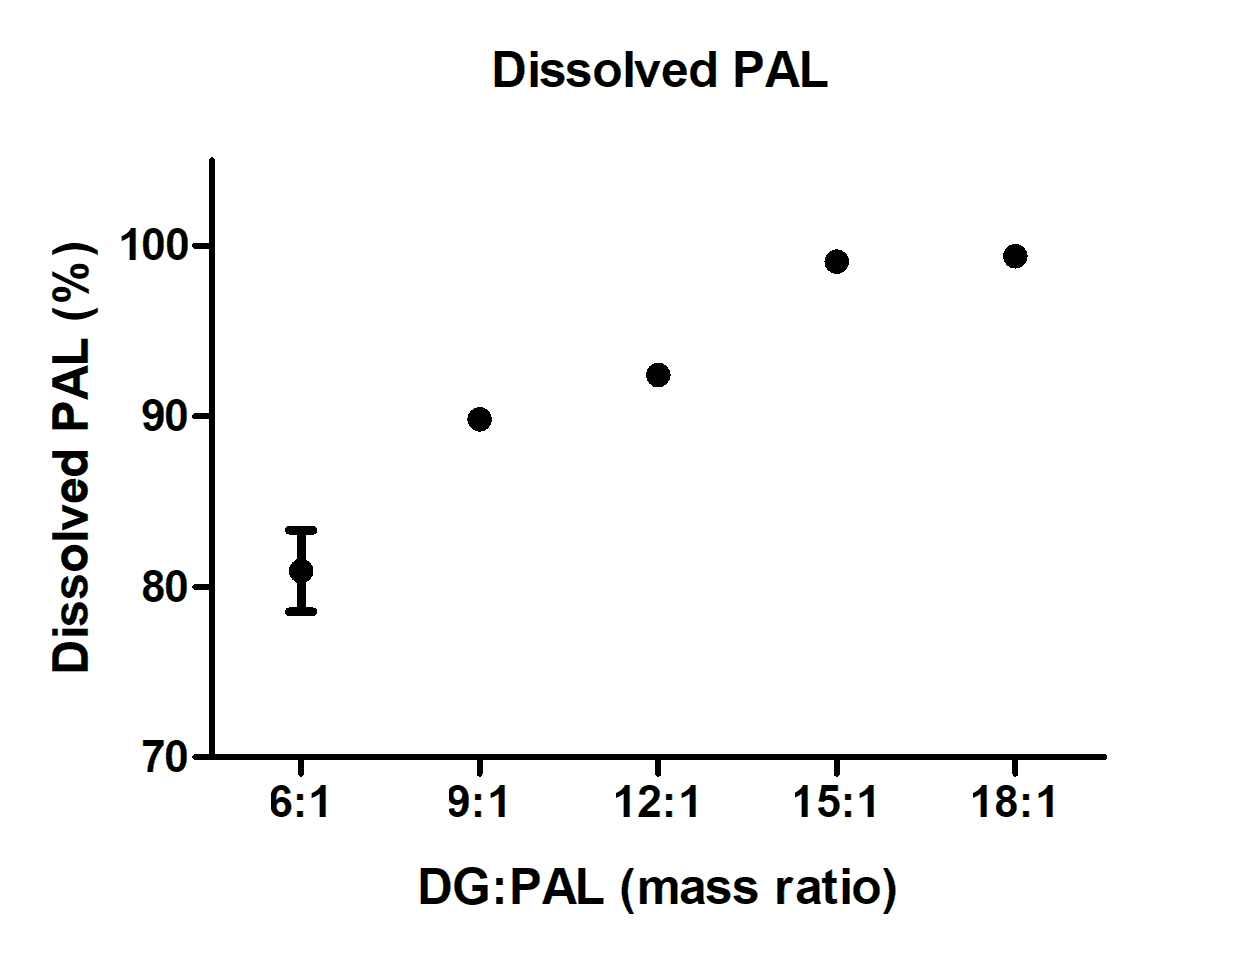
**

**Figure S1 Changing profiles of dissolved PAL with different mass ratios of DG to PAL.**


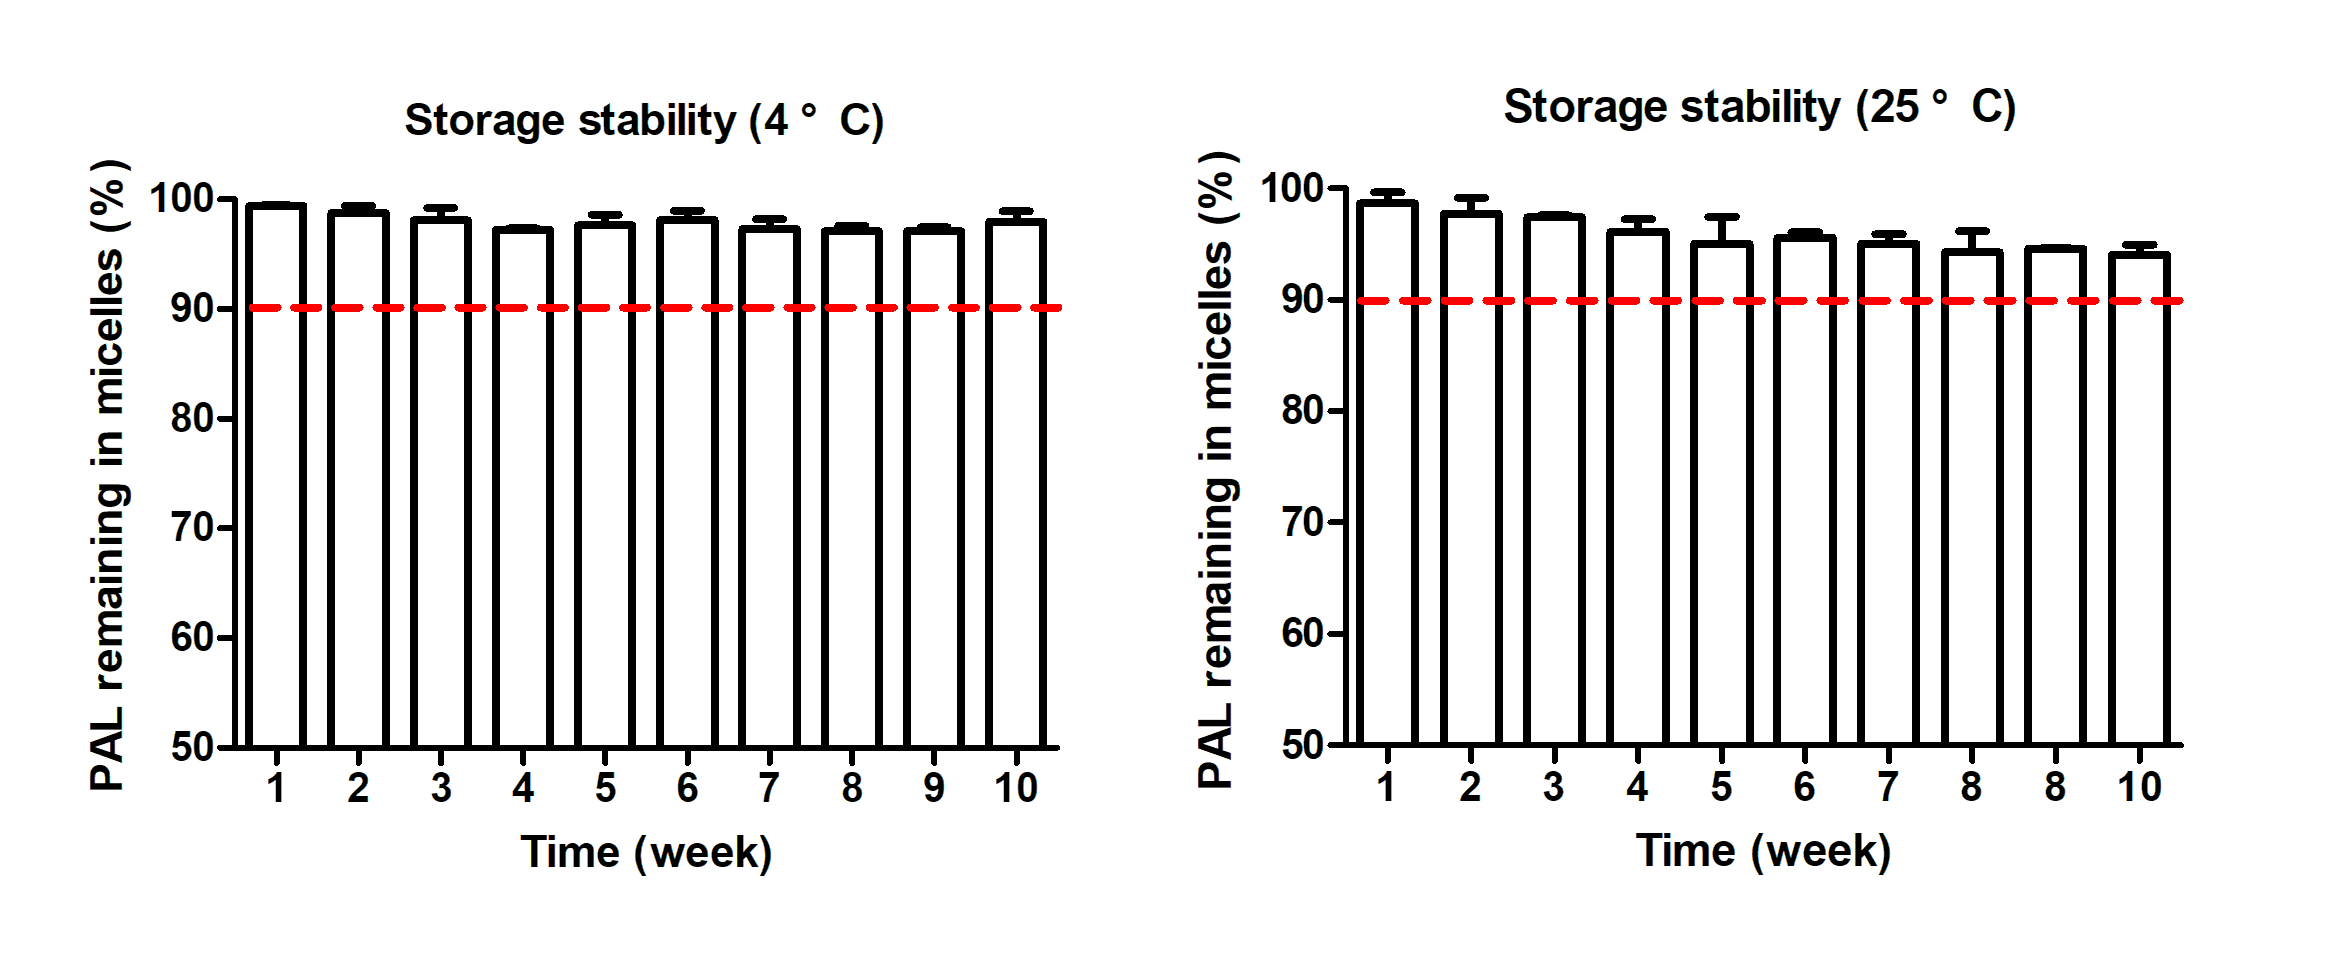


**Figure S2 Short-term storage profiles of DG-PAL ophthalmic solution with a DG/PAL mass ratio of 15:1.** (n = 3).

**
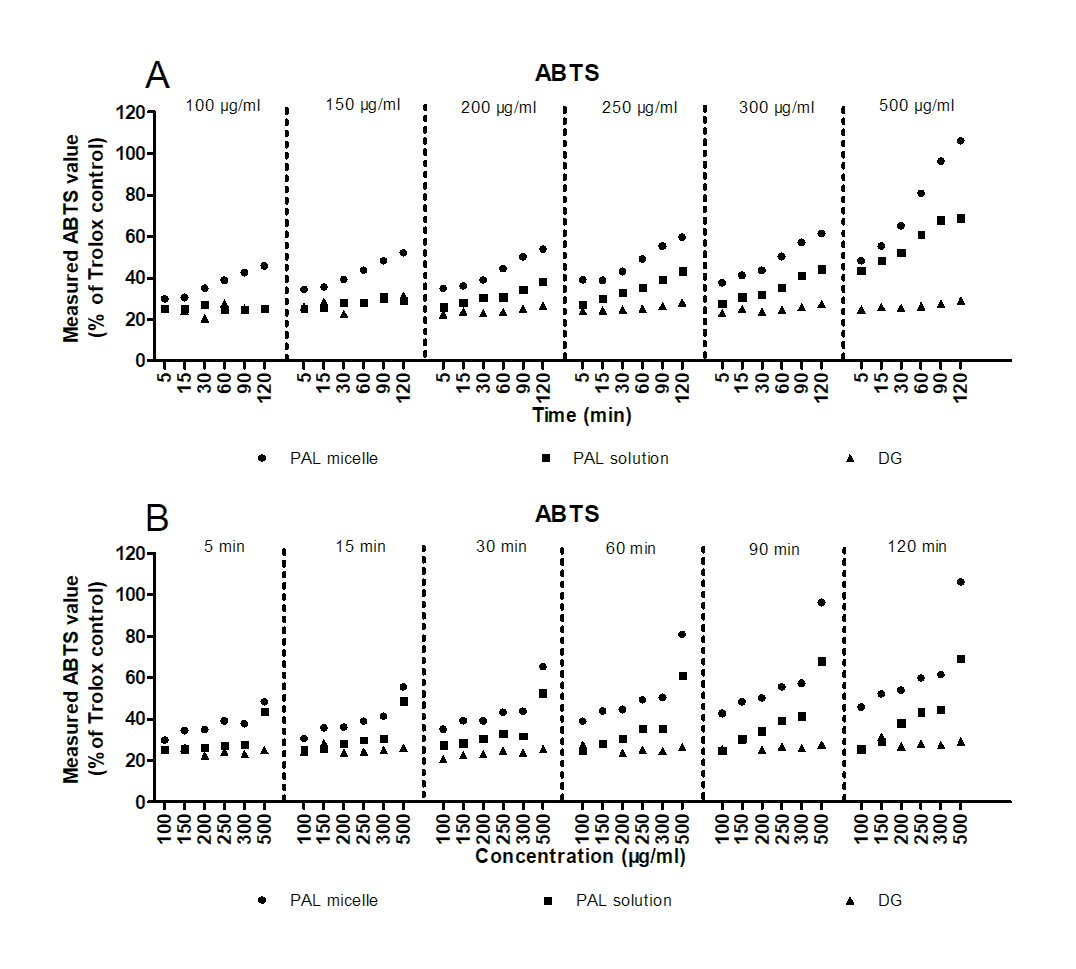
**

**Figure S3 Measured antioxidant characterizations.** Measured ABTS values of DG, free PAL and DG-PAL with (A) different incubation times as functions of concentration and (B) different concentrations as functions of time.

**
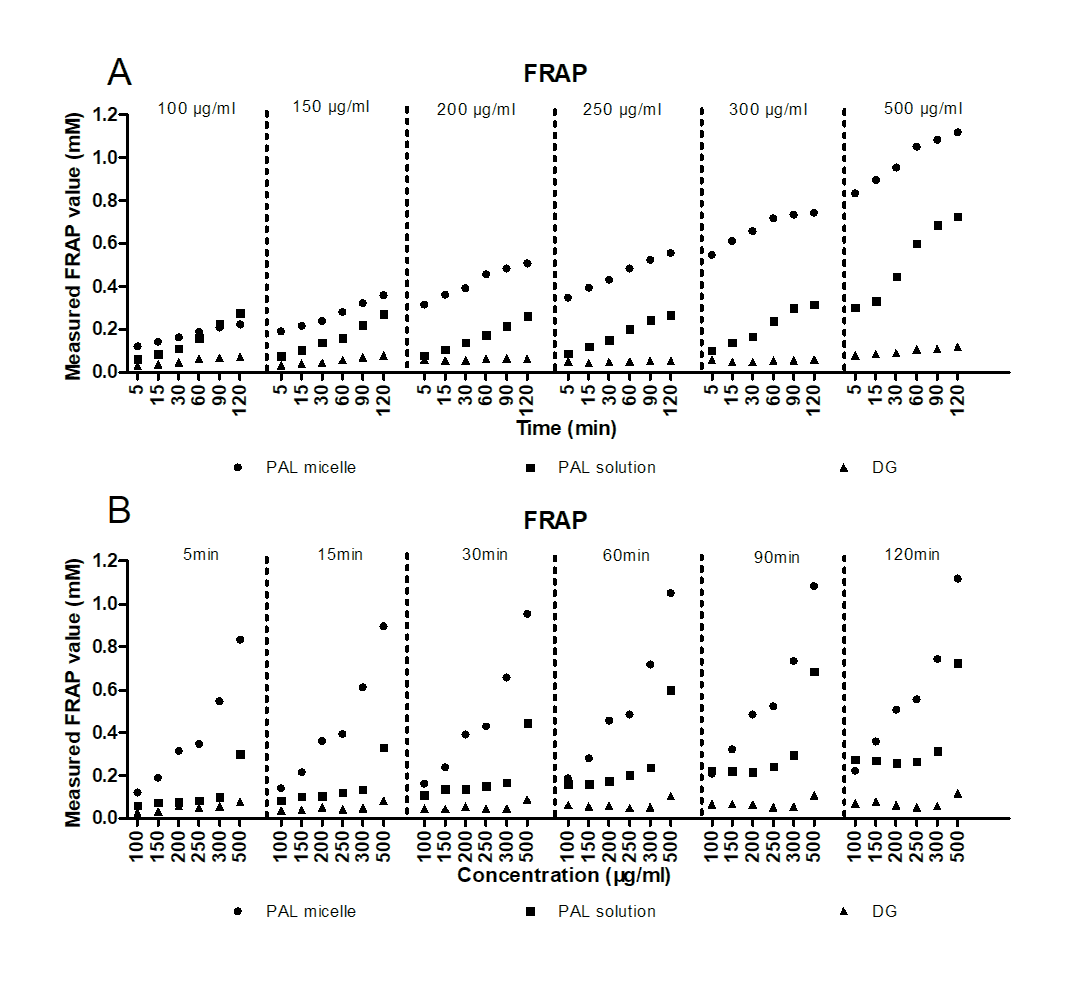
**

**Figure S4 Measured antioxidant characterizations.** Measured FRAP values of DG, free PAL and DG-PAL with (C) different incubation times as functions of concentration and (D) different concentrations as functions of time.

**
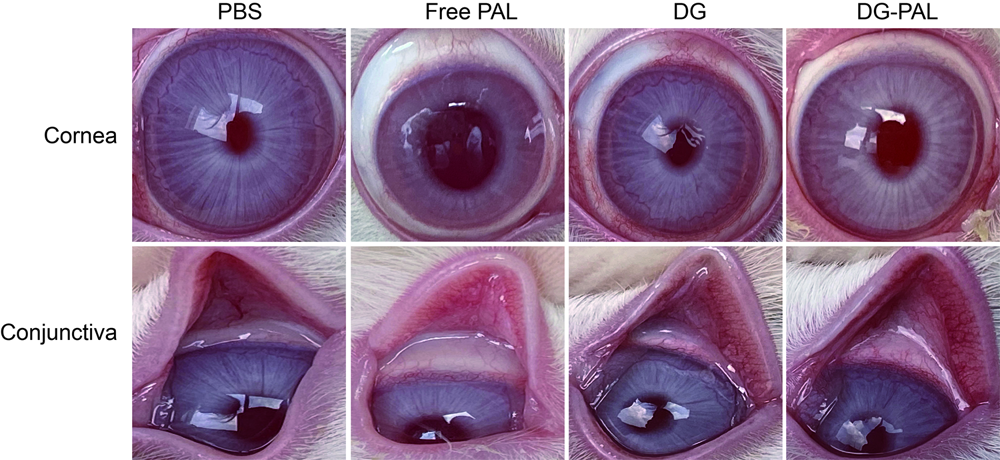
**

**Figure S5 Evaluation of the DG-PAL ophthalmic solution for potential ocular irritation.** General slit-lamp biomicroscopic observation of rabbit eyes 24 h after the last topical instillation.

**
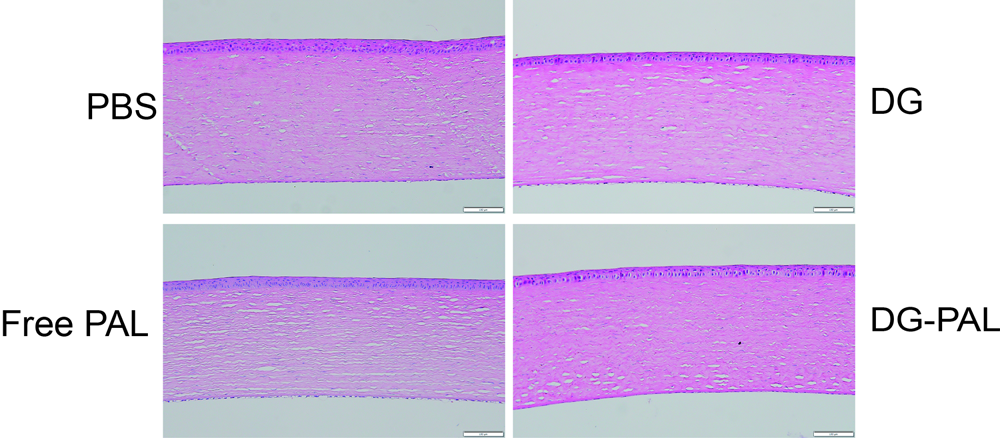
**

**Figure S6 Evaluation of the DG-PAL ophthalmic solution for potential ocular irritation.** Histopathological findings from the corneas 24 h after the last topical instillation. Bar = 100 μm in images.

**
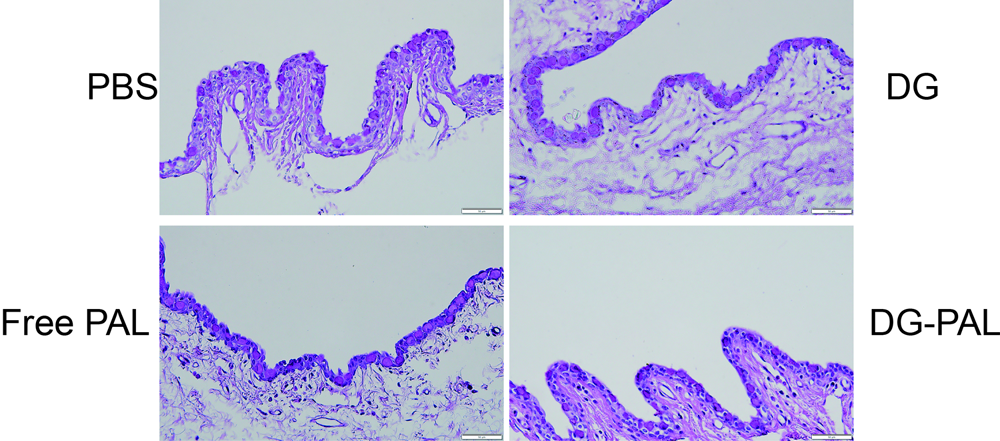
**

**Figure S7 Evaluation of the DG-PAL ophthalmic solution for potential ocular irritation.** Histopathological findings from the conjunctivas 24 h after the last topical instillation. Bar = 50 μm in the image.


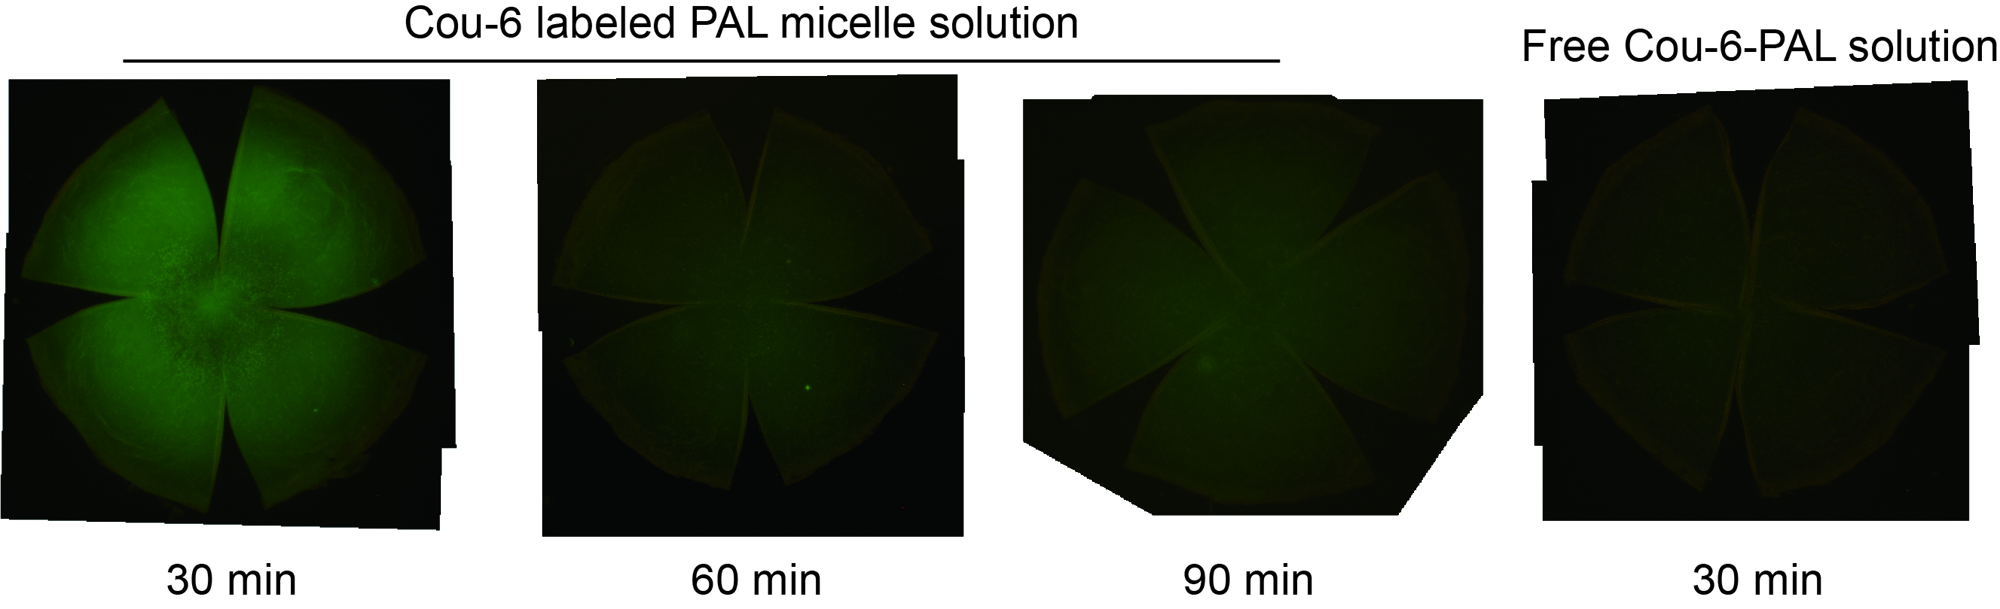


**Figure S8 *In vivo* corneal penetration.** Mouse eye was instilled four instillations (5 μl/instillation at 10-min intervals). Representative fluorescence microscopy images of mouse cornea at 30, 60, and 90 min after last instillation were obtained with an identical exposure time (50 ms). Images were recorded at 10 × magnification.

**
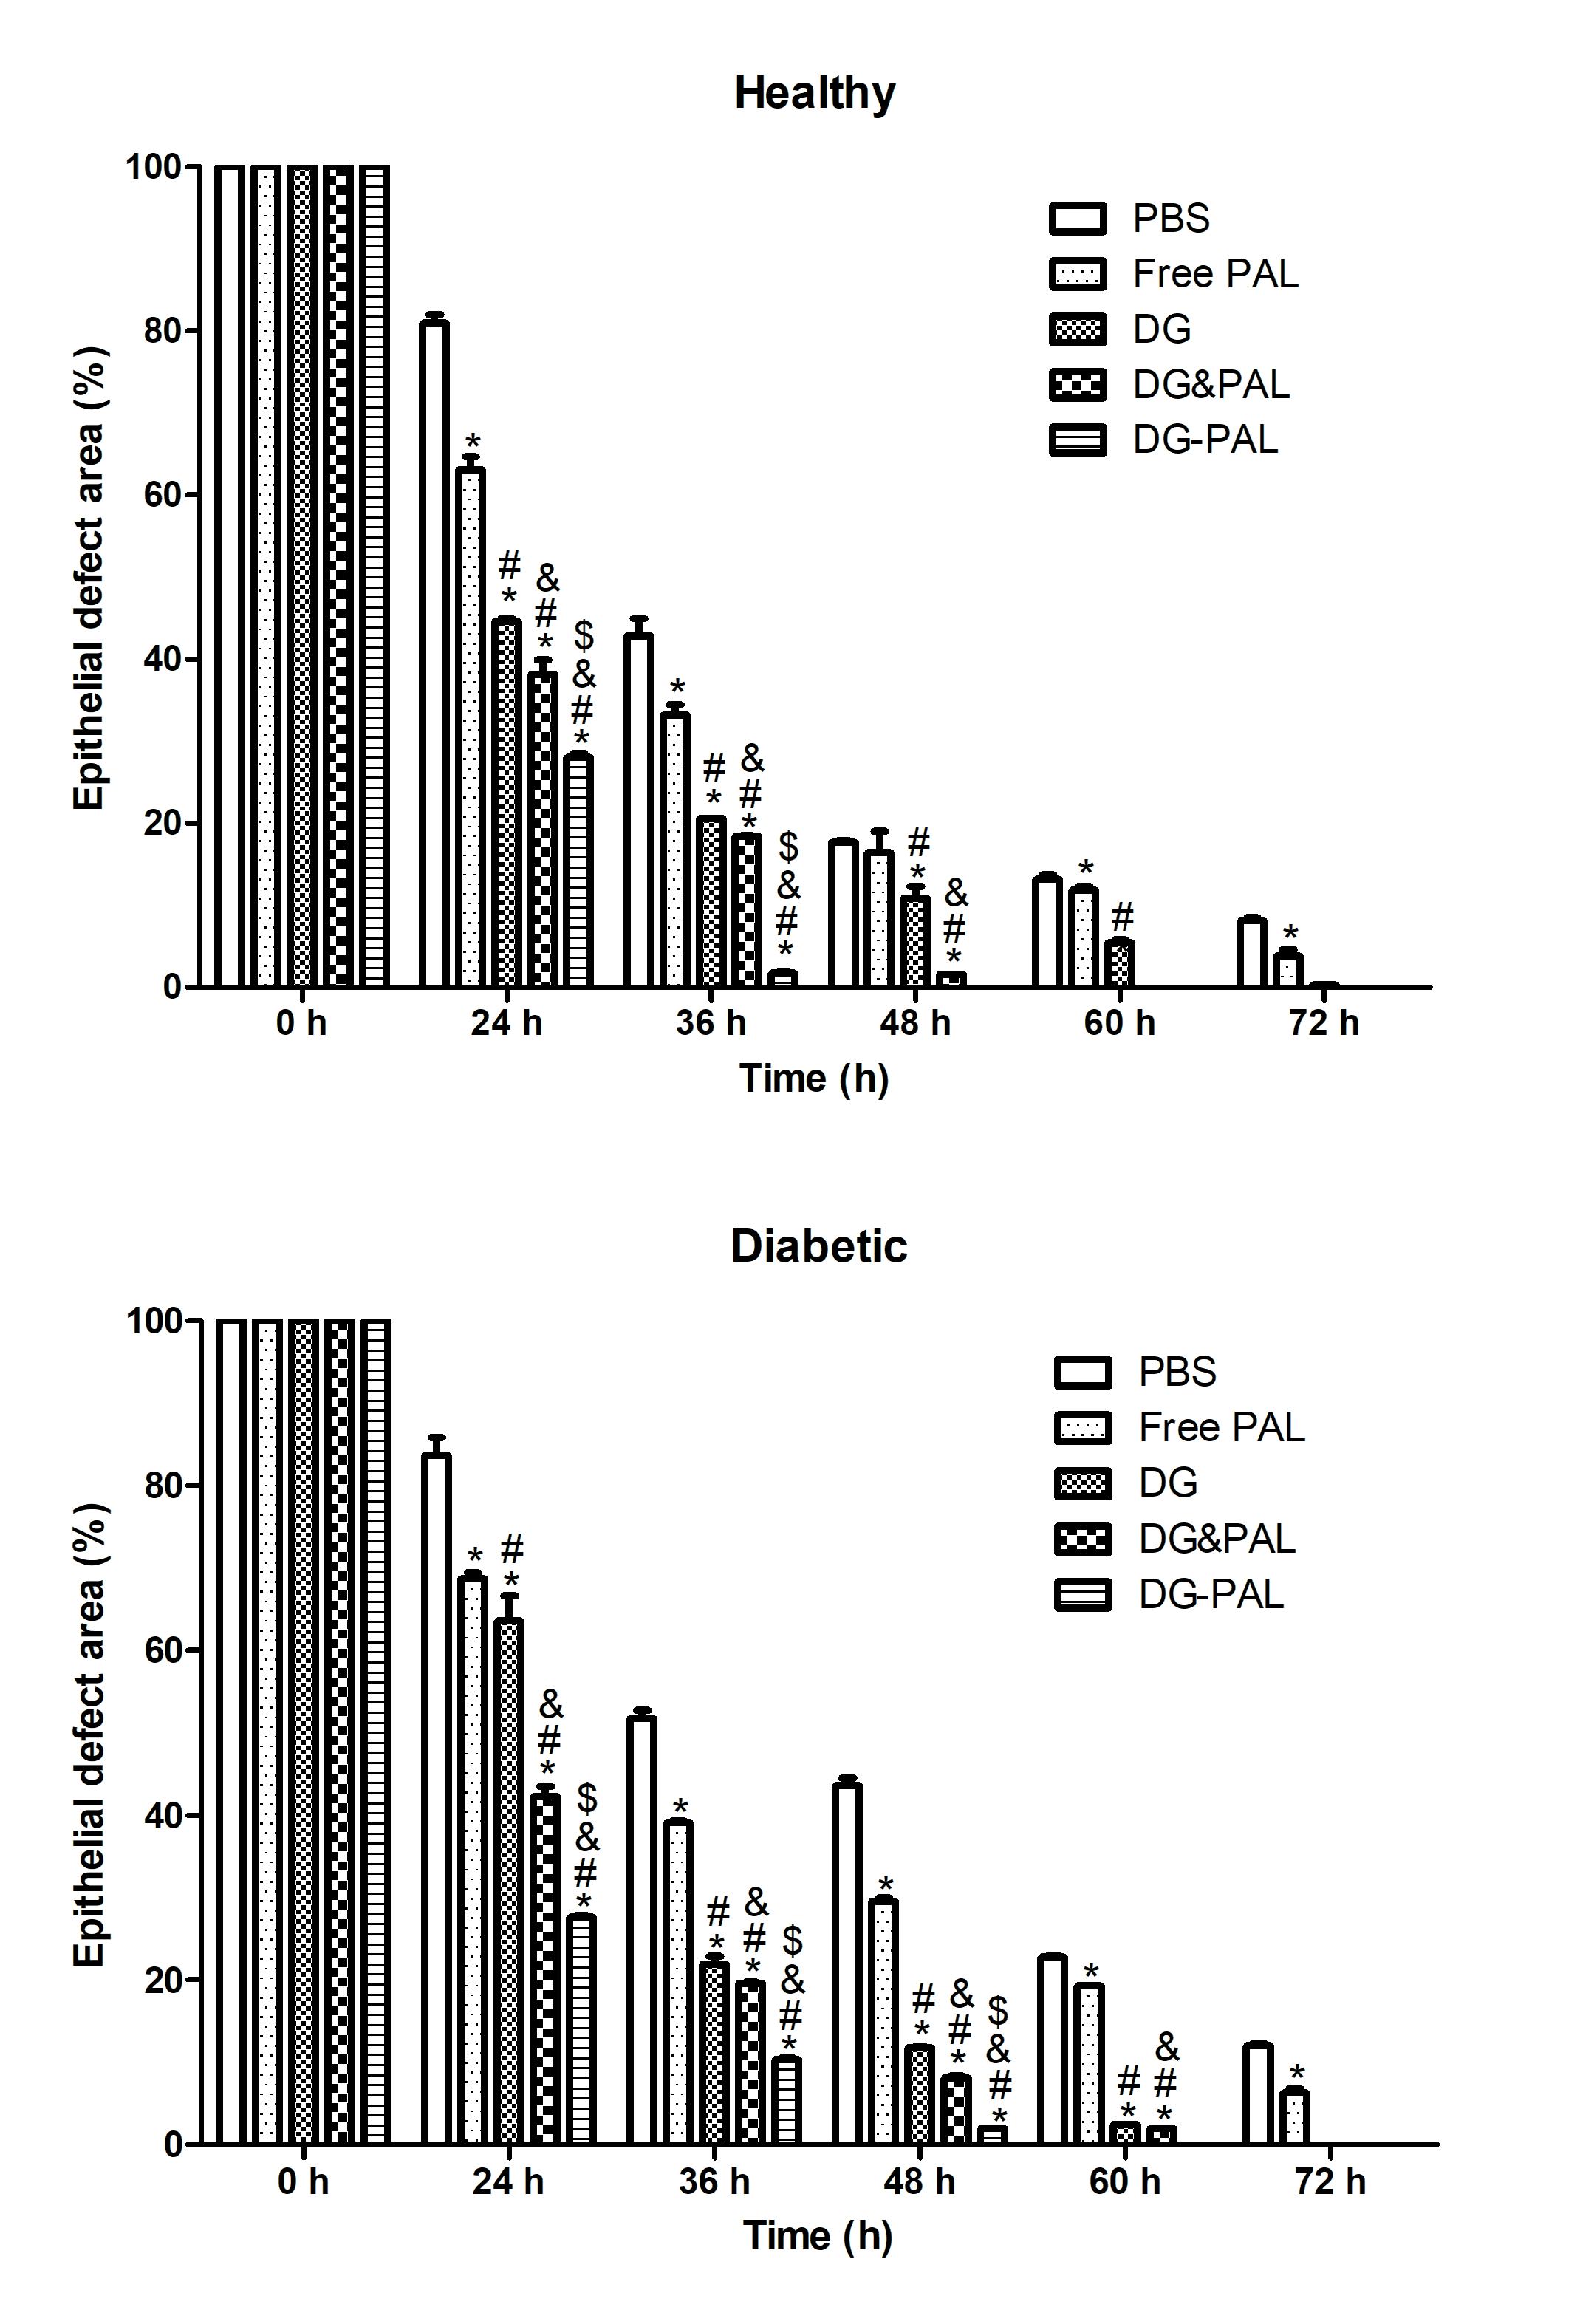
**

**Figure S9 Extent of residual epithelial defect calculated as a percentage of the original wound area in the healthy and diabetic mice** (n = 10). **P*  <  0.05, versus the PBS group; #*P*  <  0.05, versus the free PAL group; &*P*  <  0.05, versus the DG group; $*P*  <  0.05, versus the DG&PAL group.


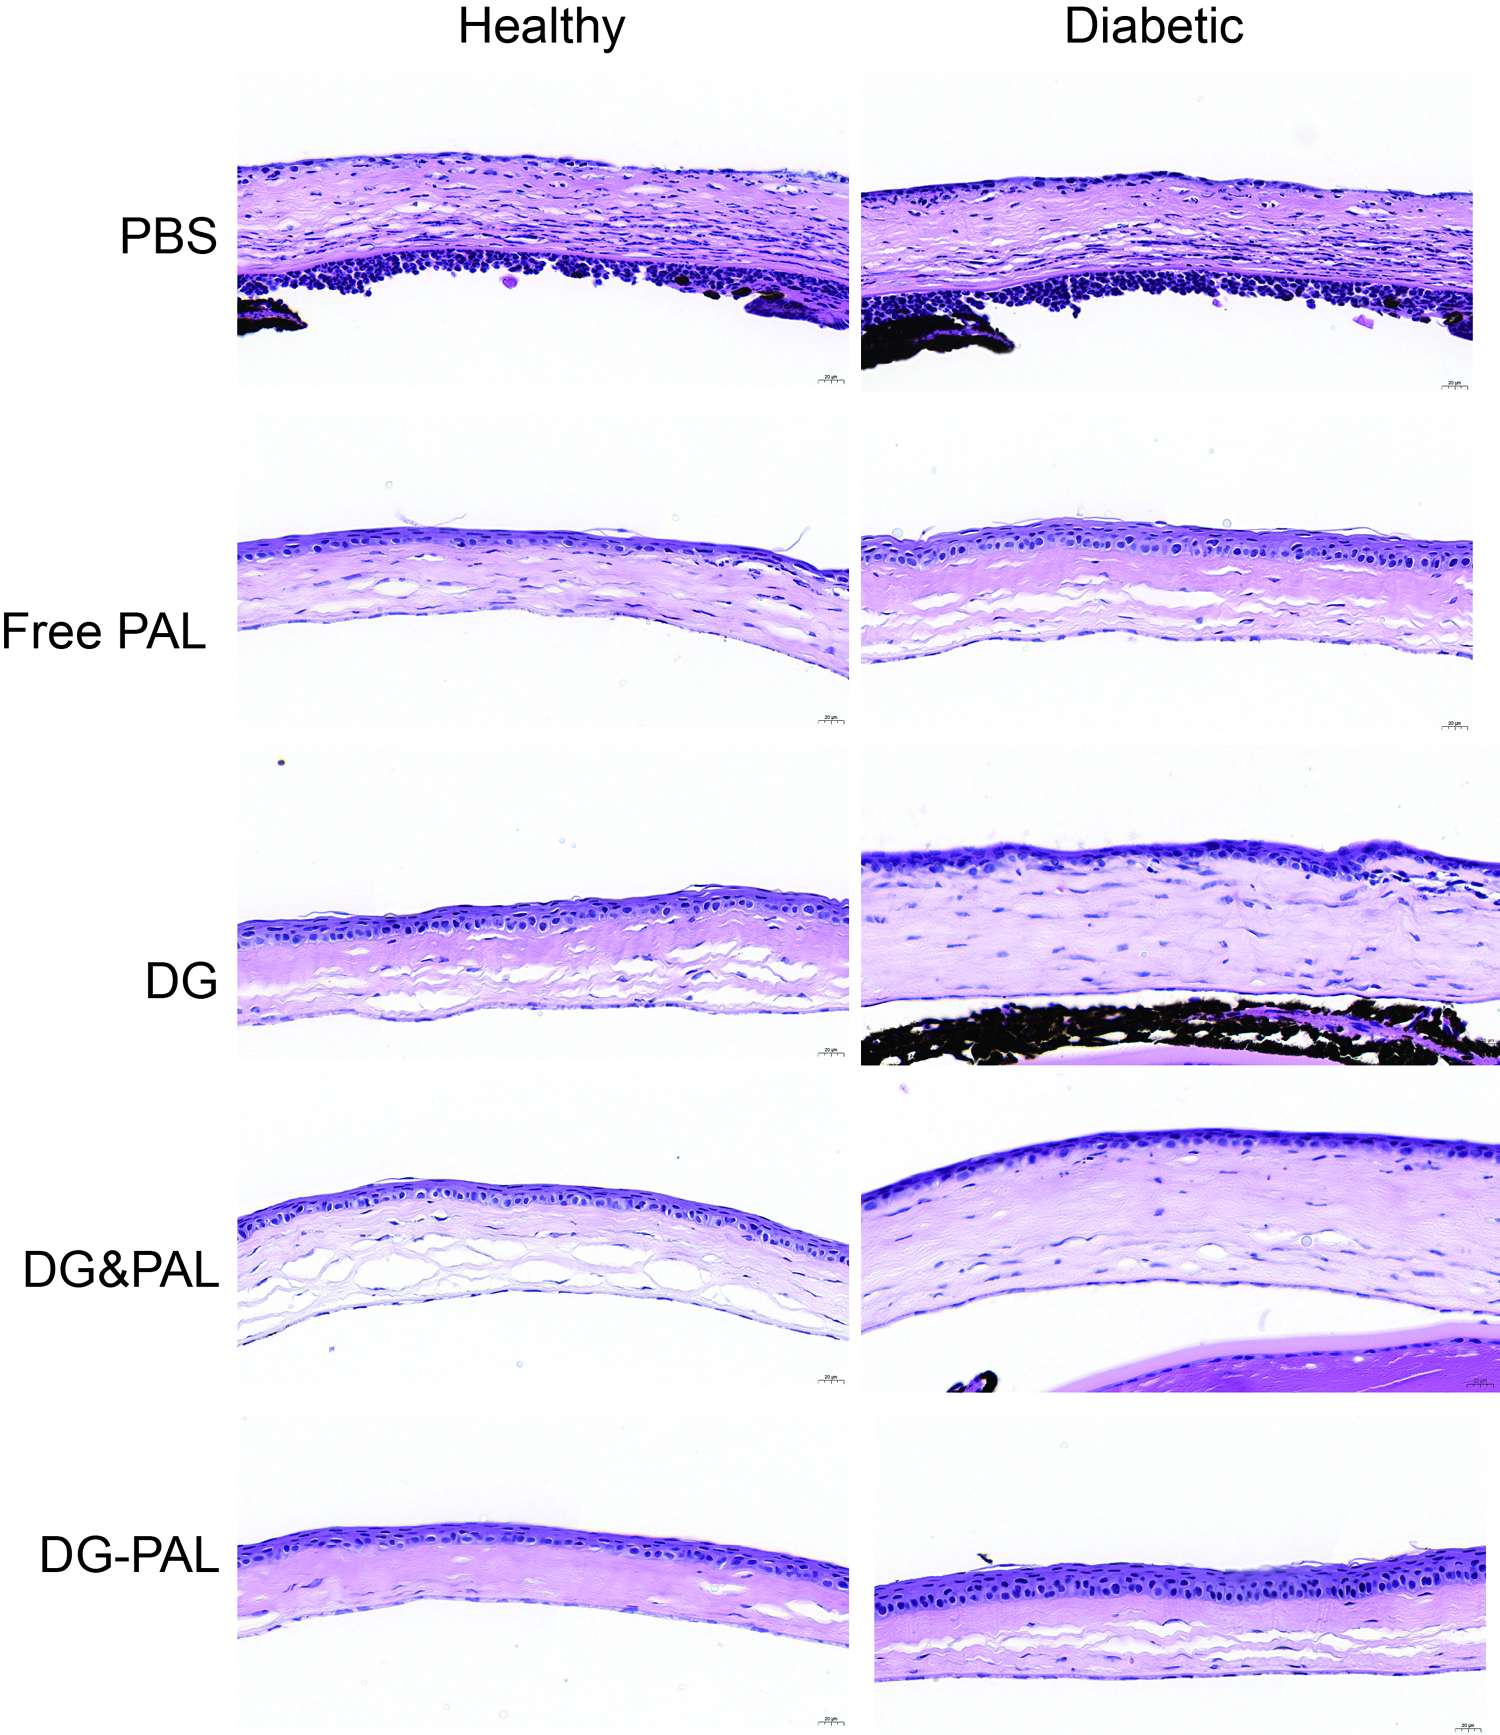


**Figure S10 Histopathological observation.** Histopathological evaluations of health and diabetic mice corneas 72 h (to health mice) or 96 h (to diabetic mice) after treated with different tested solution. Bar = 20 μm in the images.
